# Supplementary material for: The Application of Gas Dwell Time Control for Rapid Single Wall Carbon Nanotube Forest Synthesis to Acetylene Feedstock
Source: MDPI journal article supplement (doi:10.3390/nano5031200), 2015-07-17
Supplement: s1 [file s1]

## Supplementary Information

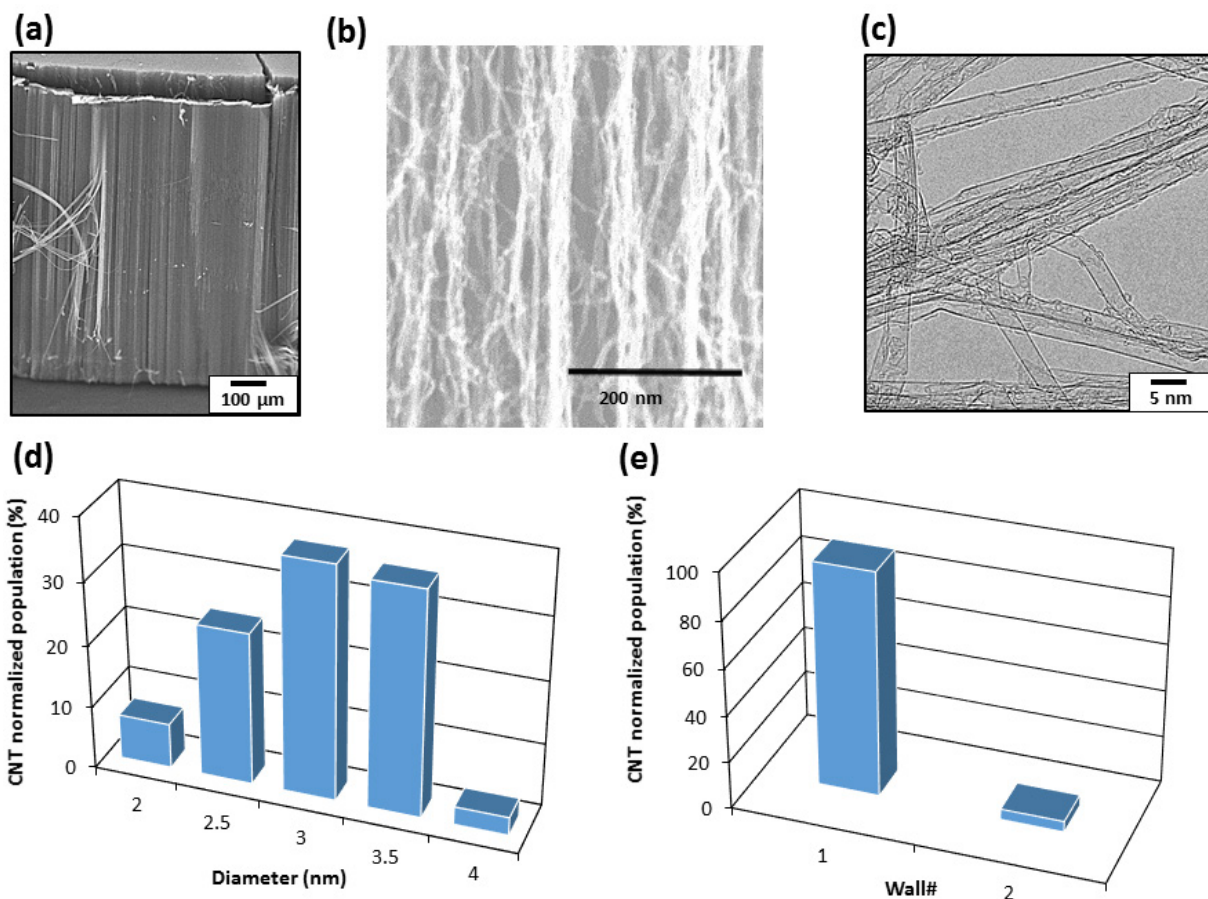

**Figure S1.** Structure of carbon nanotube (CNT) synthesized by using acetylene. Scanning electron microscope (SEM) image: (a) low and (b) high magnification, (c) transmission electron microscopy (TEM) image, and histograms of the (d) wall number and (e) diameter distribution from TEM images.

© 2015 by the author; licensee MDPI, Basel, Switzerland. This article is an open access article distributed under the terms and conditions of the Creative Commons Attribution license (<http://creativecommons.org/licenses/by/4.0/>).
